# Supplementary material
Source: PubMed Central journal article supplement (PMC4000088)

# Figure 3-1

**Fig. 3A-Rac1 (total)**

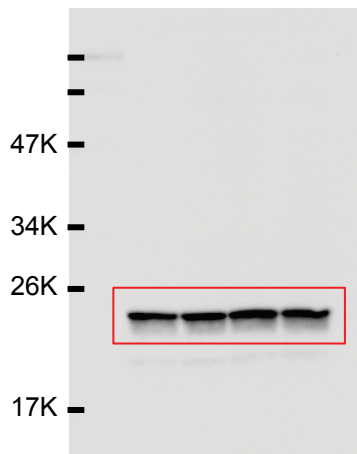

**Fig. 3A-Rac1 (active)**

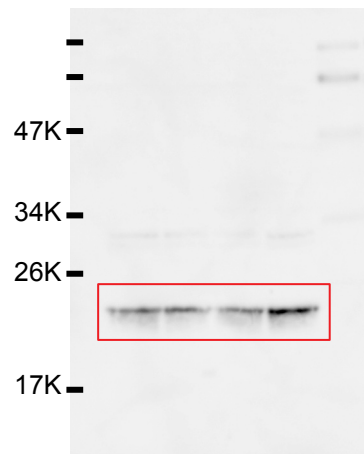

**Fig. 3B (left)-Rac1 (total)**

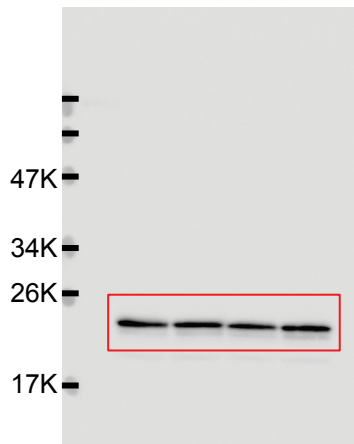

**Fig. 3B (left)-Rac1 (active)**

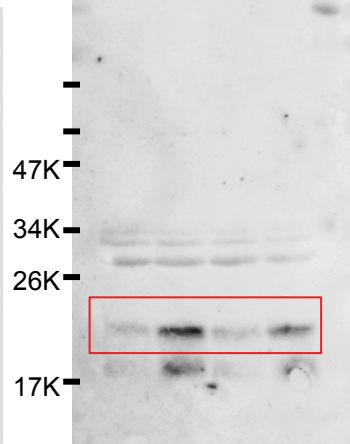

**Fig. 3B (middle)-Rac1 (total)**

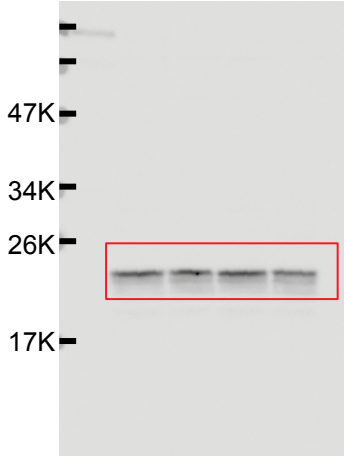

**Fig. 3B (middle)-Rac1 (active)**

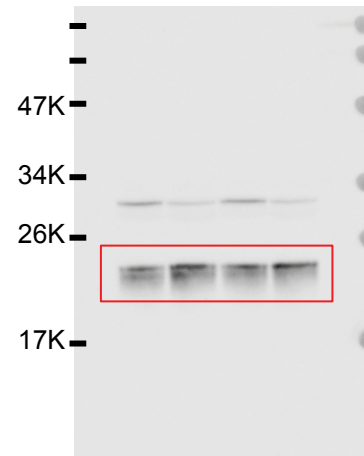

# Figure 3-2

**Fig. 3B (right)-Rac1 (total)**

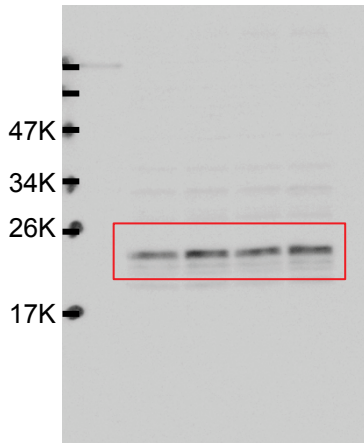

**Fig. 3B (right)-Rac1 (active)**

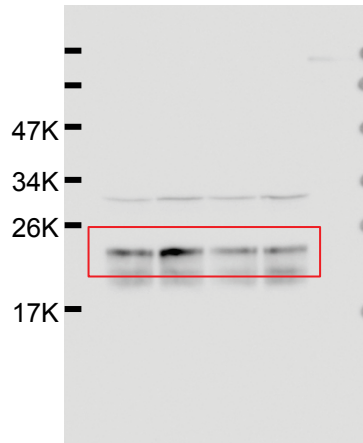

**Fig. 3C-ppMLC2**

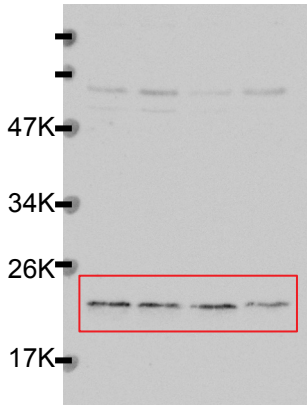

**Fig. 3C-MLC2**

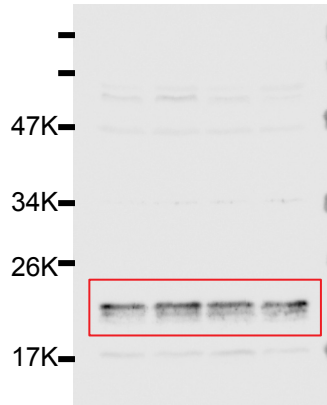

**Fig. 3D (left)-RhoA (total)**

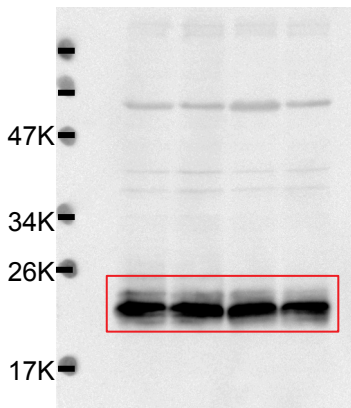

**Fig. 3D (left)-RhoA (active)**

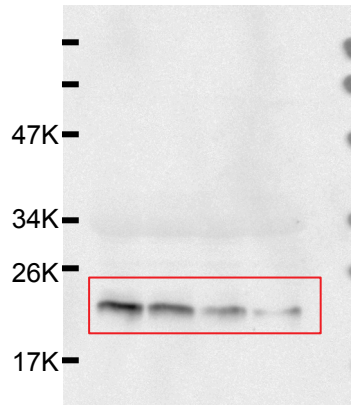

# Figure 3-3

**Fig. 3D (right)-RhoA (total)**

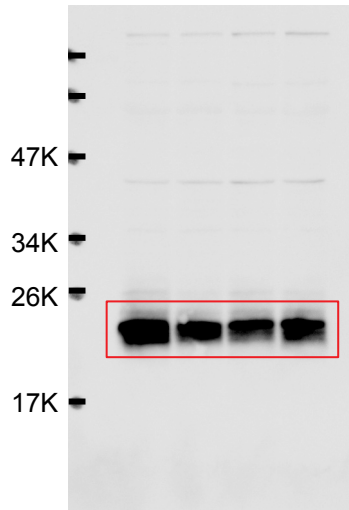

**Fig. 3D (right)-RhoA (active)**

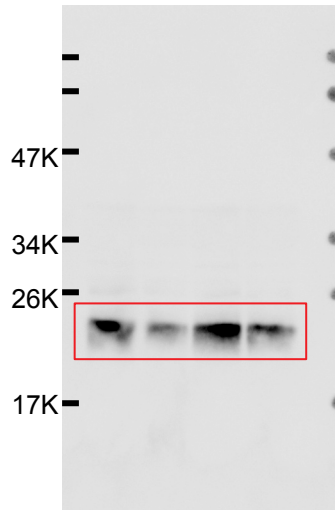

**Fig. 3E (right)-RhoA  
(total) (active)**

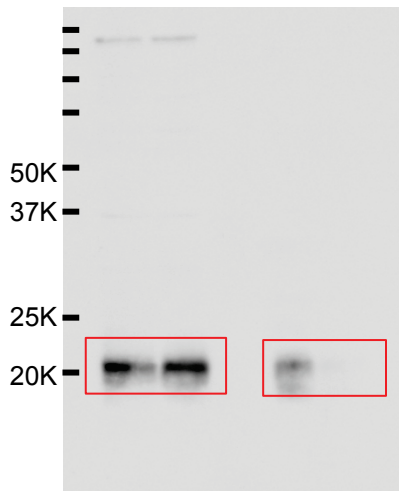

**Fig. 3E (left)-RhoA  
(total) (active)**

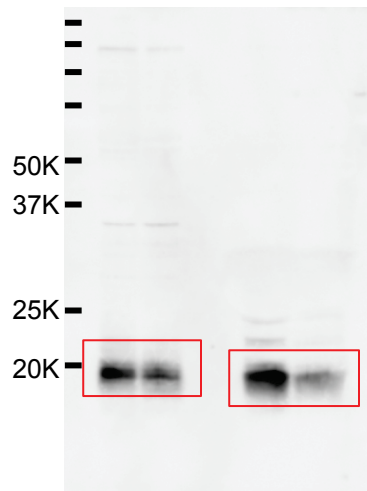

Supplement: embj0033-0702-sd19.pdf [file embj0033-0702-sd19.pdf]
