# Supplementary material
Source: PubMed Central journal article supplement (PMC4000088)
Supplement: embj0033-0702-sd1.pdf [file embj0033-0702-sd1.pdf]

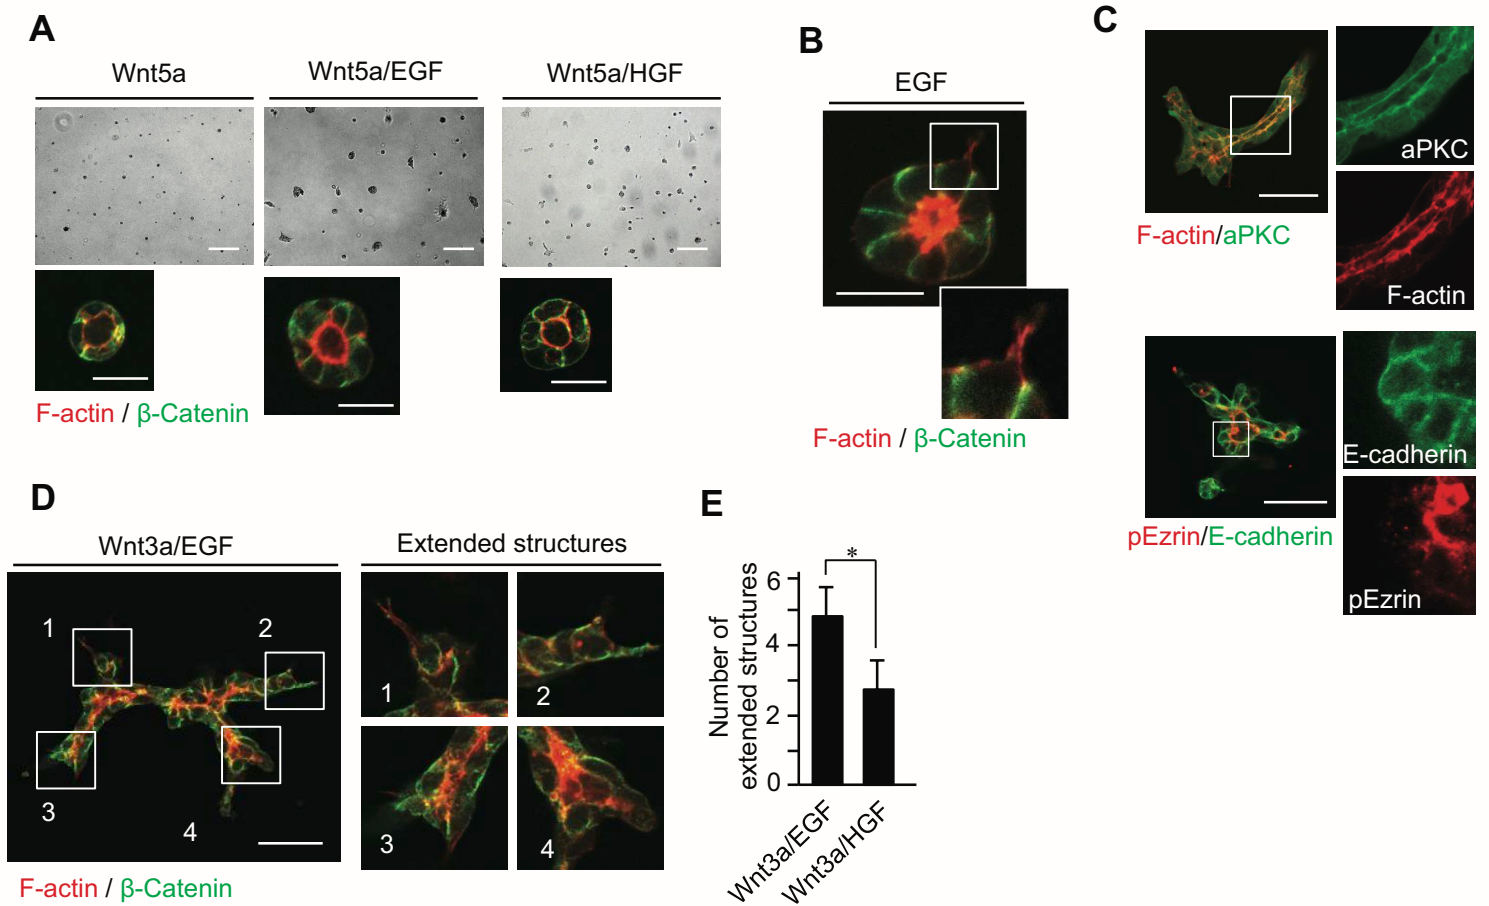

**Supplementary Figure S1** Wnt3a/EGF forms tubular structures of IEC6 cells in 3D culture. **(A)** IEC6 cells were cultured with Wnt5a, Wnt5a/EGF, or Wnt5a/HGF for 72 h in 3D culture. The representative structures were photographed using phase contrast microscopy (top panels). The cells were stained with anti- $\beta$ -catenin antibody and phalloidin (bottom panels). **(B)** IEC6 cells were cultured with EGF for 60 h in 3D culture and stained with anti- $\beta$ -catenin antibody and phalloidin. White boxes show enlarged images. **(C)** IEC6 cells were cultured with Wnt3a/EGF for 60 h and stained with anti-aPKC, anti-phospho-ezrin, and anti-E-cadherin antibodies and phalloidin. **(D)** IEC6 cells were cultured with Wnt3a/EGF for 60 h in 3D culture and stained with anti- $\beta$ -catenin antibody and phalloidin. The number of extended structures were counted as four. **(E)** IEC6 cells were cultured with Wnt3a/EGF or Wnt3a/HGF for 72 h in 3D culture. The number of extended structures from multicellular trunks were counted (n=30). Results are shown as the mean  $\pm$  SE from three independent experiments. \*,  $P < 0.01$ . Scale bars in **(A)**, 200  $\mu$ m (top panels) and 20  $\mu$ m (bottom panels); in **(B)**, 20  $\mu$ m; in **(C and D)**, 50  $\mu$ m.
