# Supplementary material
Source: PubMed Central journal article supplement (PMC4000088)
Supplement: embj0033-0702-sd4.pdf [file embj0033-0702-sd4.pdf]

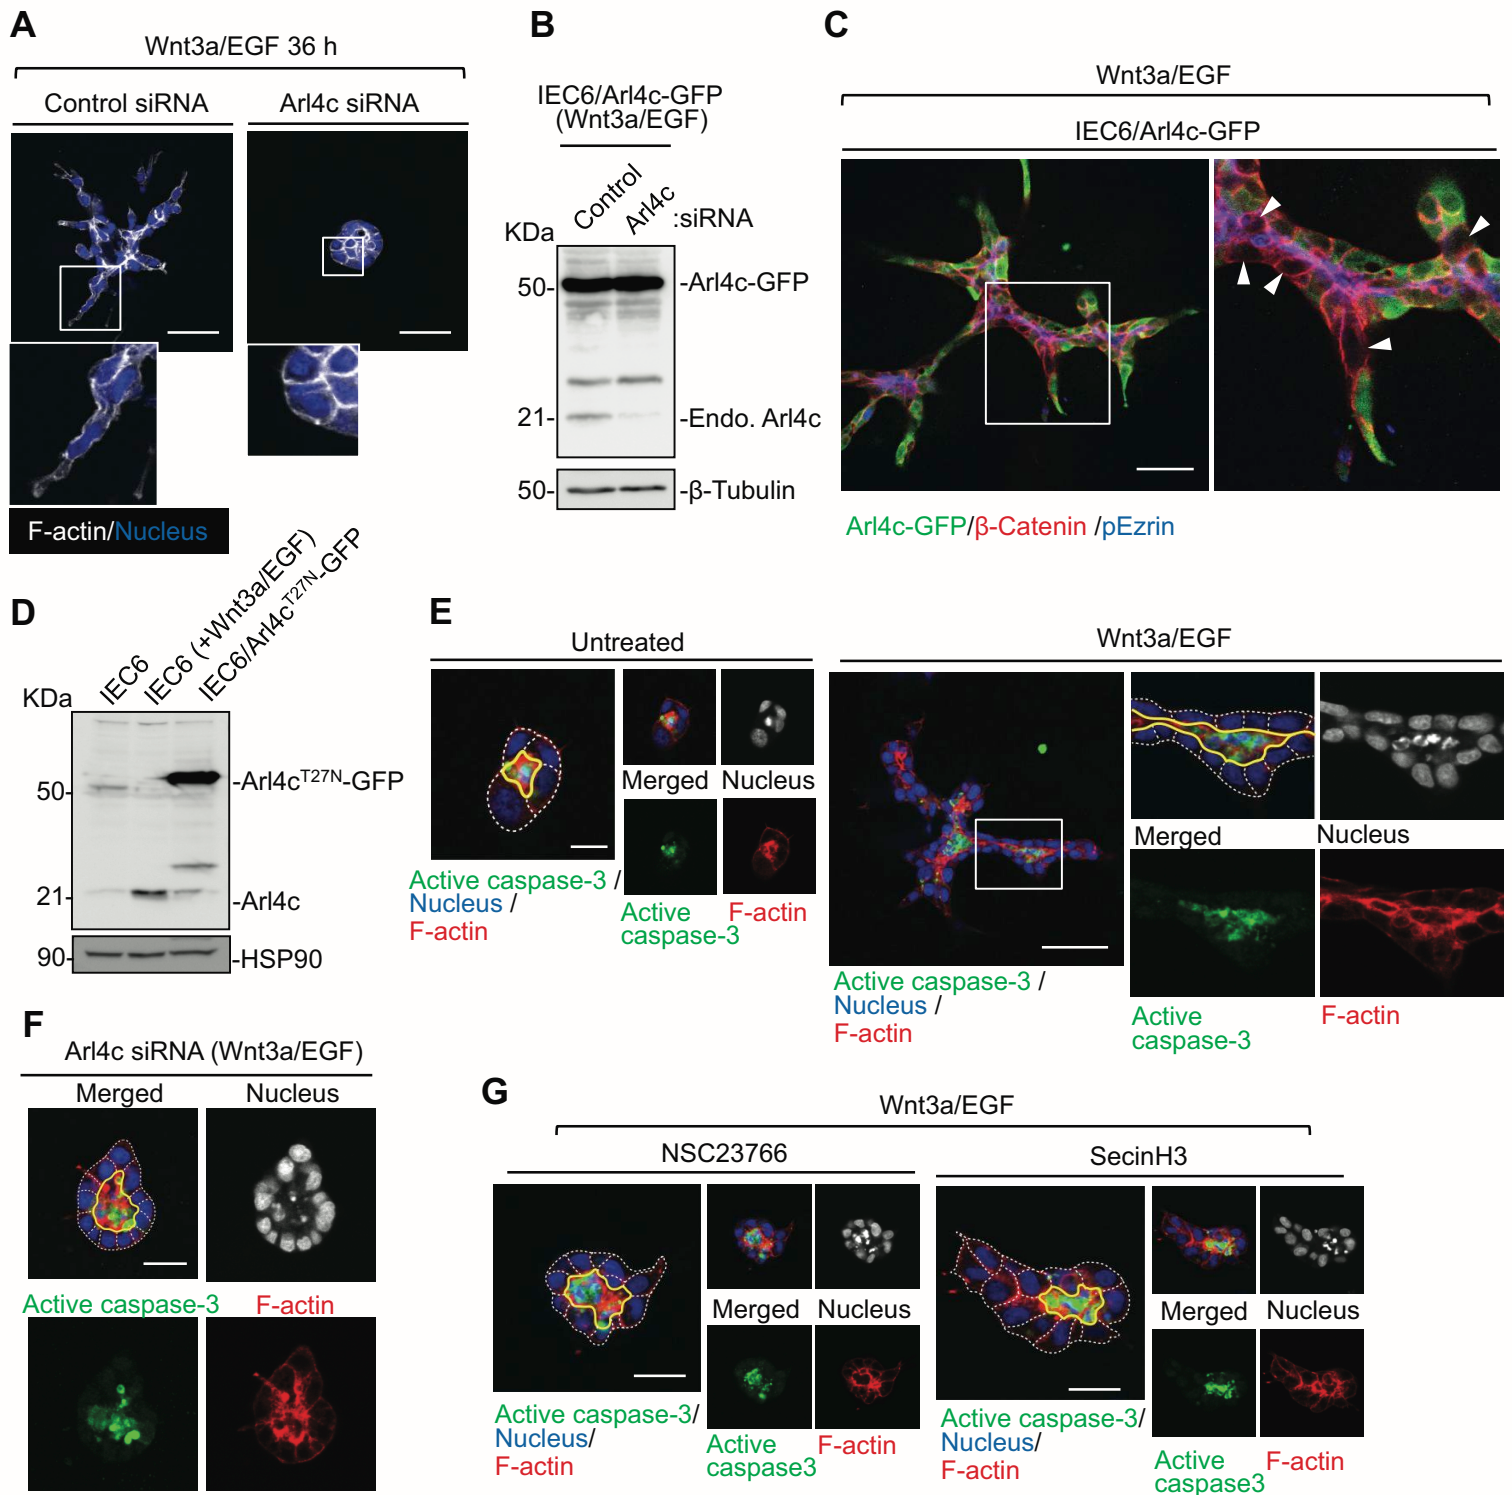

**Supplementary Figure S4** Knockdown of Arl4c or treatment with NSC23766 or SecinH3 do not affect cell viability. (A) IEC6 cells transfected with Arl4c siRNA were cultured with Wnt3a/EGF for 36 h in 3D culture and stained with phalloidin and DRAQ5. White boxes show enlarged images. (B) IEC6 cells stably expressing Arl4c-GFP, which were transfected with control or Arl4c siRNA, were treated with Wnt3a/EGF for 12 h. Lysates were probed with anti-Arl4c, anti-β-tubulin antibodies. (C) IEC6 cells stably expressing Arl4c-GFP (IEC6/Arl4c-GFP) were cultured with Wnt3a/EGF for 60 h and stained with anti-GFP, anti-phospho-ezrin, and anti-β-catenin antibodies. GFP was positive in approximately 80% of IEC6/Arl4c-GFP cells based on assessment with an anti-GFP antibody. White arrowheads indicate cells which do not express Arl4c-GFP. (D) IEC6 cells treated with or without Wnt3a/EGF for 12 h and IEC6 cells stably expressing Arl4c<sup>T27N</sup>-GFP were lysed. Lysates were probed with anti-Arl4c and anti-HSP90 antibodies. (E) IEC6 cells were cultured with or without Wnt3a/EGF for 60 h in 3D culture and stained with anti-active caspase-3 antibody, phalloidin, and DRAQ5. White dashed lines and yellow solid lines indicate outlines of basolateral and apical membranes, respectively. (F) IEC6 cells transfected with Arl4c siRNA were cultured with Wnt3a/EGF for 60 h and stained with anti-active caspase-3 antibody, phalloidin, and DRAQ5. (G) IEC6 cells were treated with Wnt3a/EGF in the presence of SecinH3 or NSC23766 for 48 h and stained with anti-active caspase-3 antibody, phalloidin, and DRAQ5. Scale bars in (A and C), 50 μm; in (E), 10 μm (left panel) and 50 μm (right panel); in (F and G), 20 μm.
