# Supplementary material
Source: PubMed Central journal article supplement (PMC4000088)
Supplement: embj0033-0702-sd6.pdf [file embj0033-0702-sd6.pdf]

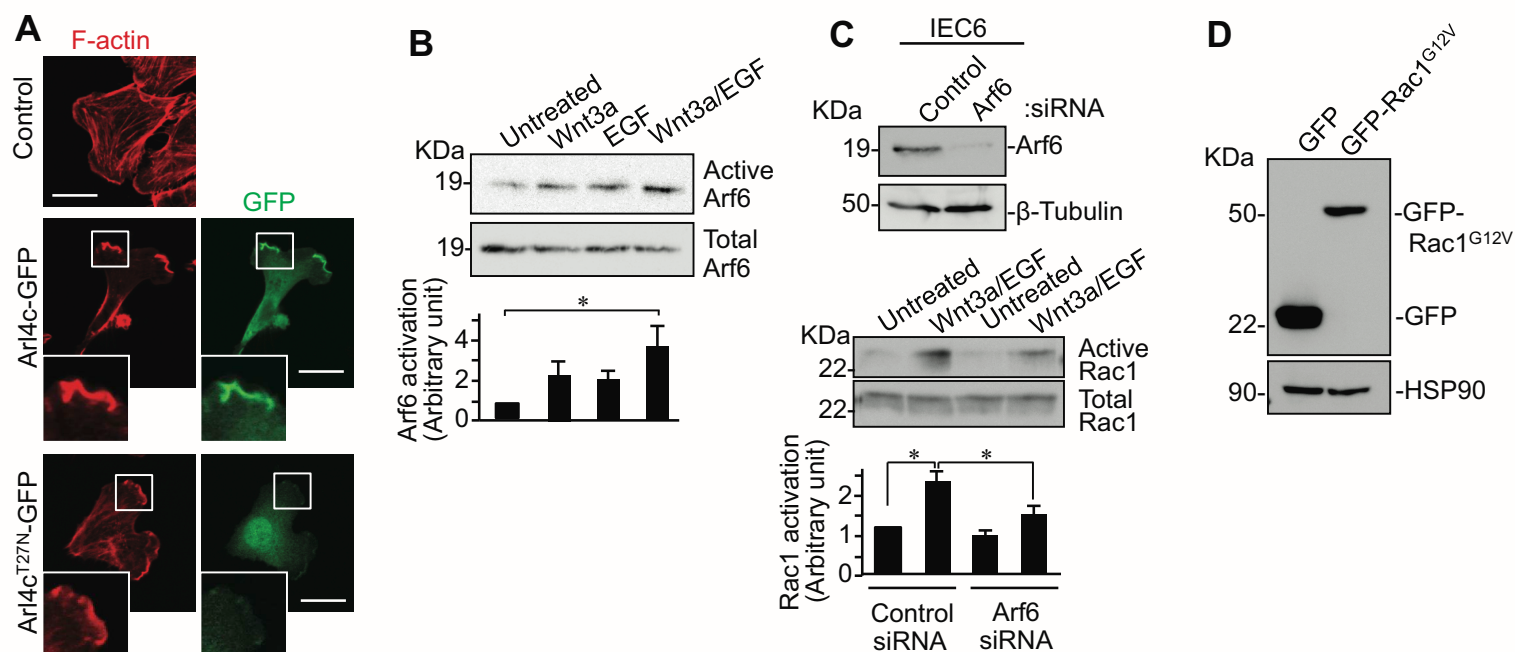

**Supplementary Figure S6** Arl4c activates Rac through Arf6. (A) IEC6 cells expressing Arl4c-GFP or Arl4c<sup>T27N</sup>-GFP were stained with anti-GFP antibody and phalloidin. (B) IEC6 cells were stimulated with Wnt3a, EGF, or Wnt3a/EGF for 18 h and cells were subjected to the Arf6 assay. (C) IEC6 cells transfected with Arf6 siRNA were stimulated with Wnt3a/EGF for 18 h in 2D culture and subjected to the Rac assay. Lysates of IEC6 cells transfected with Arf6 siRNA were probed with anti-Arf6 and anti- $\beta$ -tubulin antibodies. (D) Lysates of IEC6 cells stably expressing GFP or GFP-Rac1<sup>G12V</sup> were probed with anti-GFP and anti-HSP90 antibodies. Results are shown as the mean  $\pm$  SE from three independent experiments. Scale bars in (A), 20  $\mu$ m.
