# Supplementary material
Source: PubMed Central journal article supplement (PMC4000088)
Supplement: embj0033-0702-sd7.pdf [file embj0033-0702-sd7.pdf]

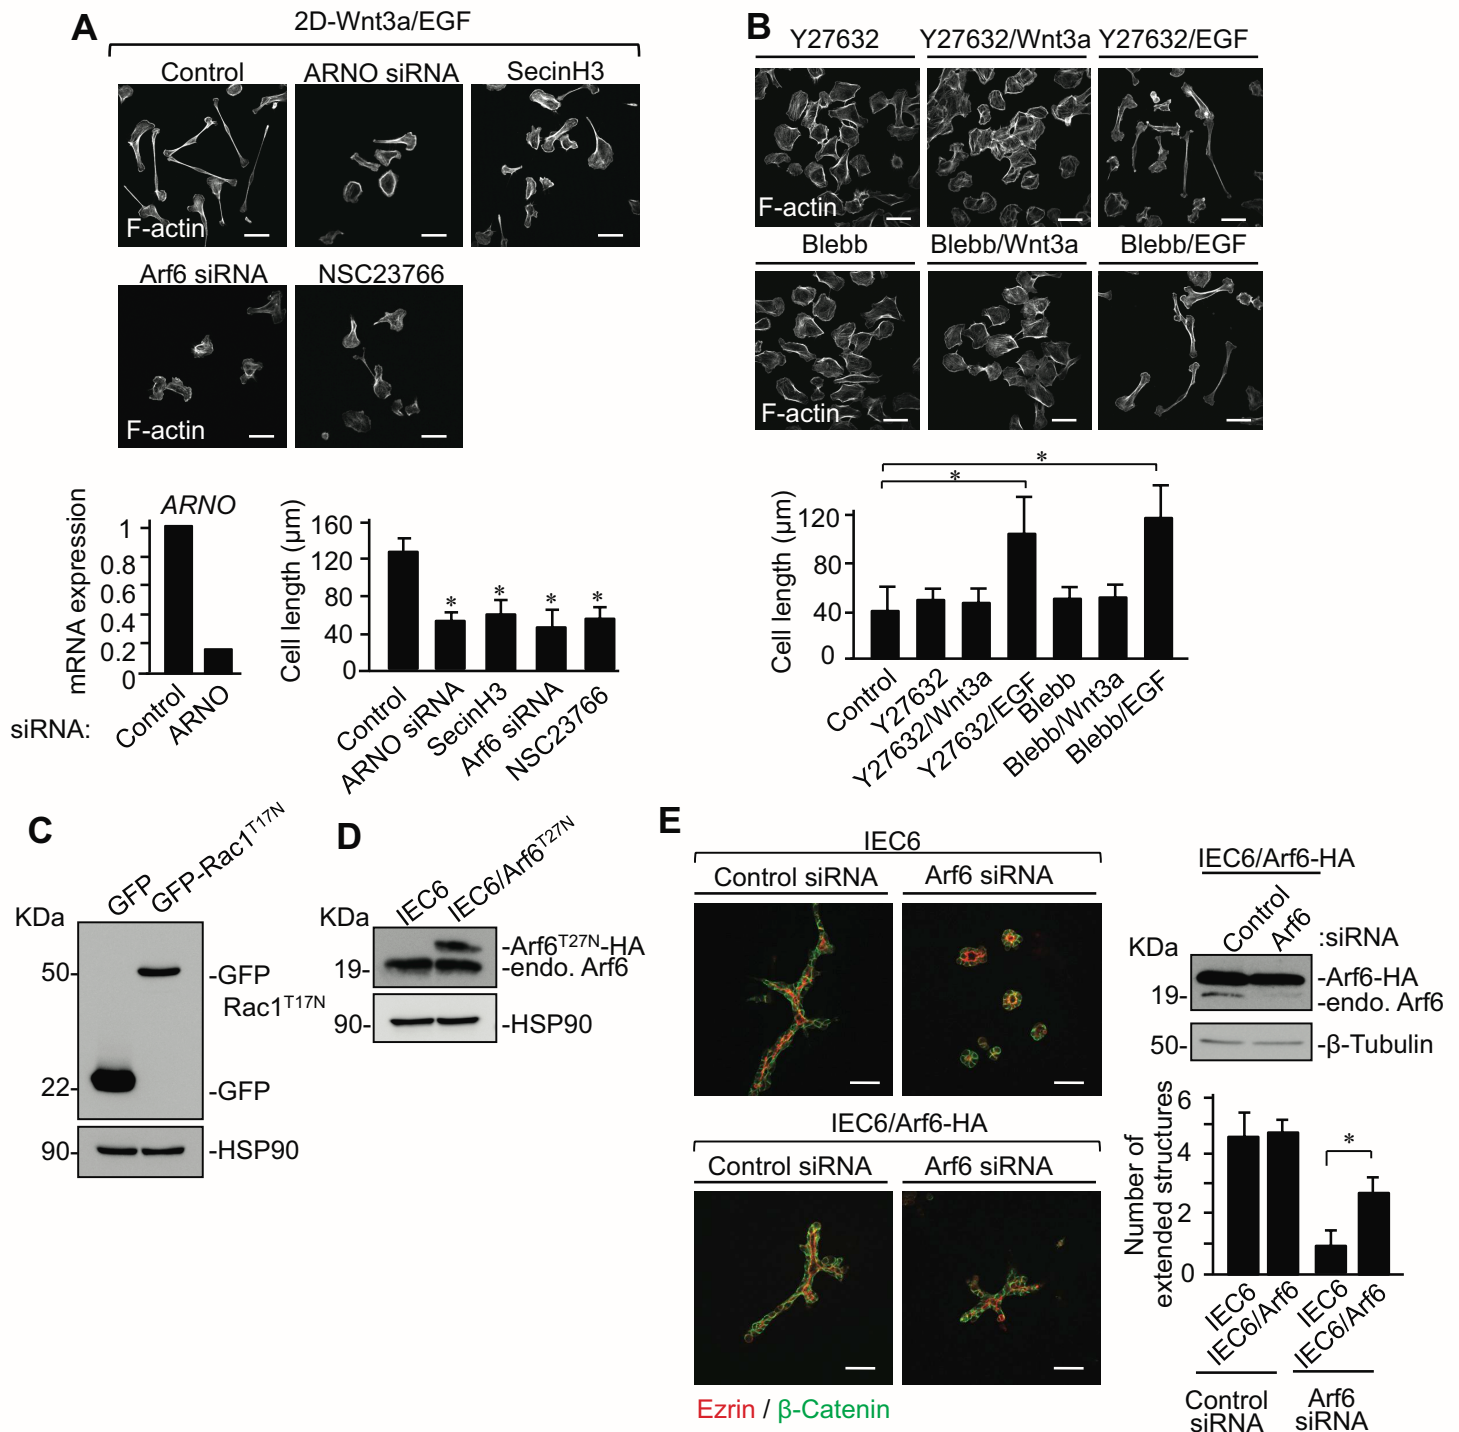

**Supplementary Figure S7** The Arf6-Rac-Rho axis is required for Wnt3a/EGF-dependent changes in cell morphology and tube formation. (A) IEC6 cells treated with SecinH3 or NSC23766 or transfected with indicated siRNAs were stimulated with Wnt3a/EGF for 18 h in 2D culture and stained with phalloidin. Real-time PCR analyses for *ARNO* mRNA expression were performed. The length of the long axis of cells was measured (n=50). (B) IEC6 cells were stimulated with Y27632 (2  $\mu\text{M}$ ), Y27632/Wnt3a, Y27632/EGF, blebbistatin (2  $\mu\text{M}$ ), blebbistatin/Wnt3a, or blebbistatin/EGF for 18 h in 2D culture and stained with phalloidin. Blebb, blebbistatin. The length of the long axis of cells was measured (n=50). (C) Lysates of IEC6 cells stably expressing GFP or GFP-Rac1<sup>T17N</sup> were probed with anti-GFP and anti-HSP90 antibodies. (D) Lysates of IEC6 cells stably expressing Arf6<sup>T27N</sup>-HA were probed with anti-Arf6 and anti-HSP90 antibodies. (E) Control IEC6 cells or IEC6 cells stably expressing Arf6-HA were transfected with control or Arf6 siRNA and treated with Wnt3a/EGF for 60 h in 3D culture. Cells were stained with anti- $\beta$ -catenin and anti-ezrin antibodies. Lysates were probed with anti-Arf6 and anti- $\beta$ -tubulin antibodies. The number of extended structures from multicellular trunks were counted (n=30). Results are shown as the mean  $\pm$  SE from three independent experiments. Scale bars in (A, B, and E), 50  $\mu\text{m}$ .
