# Supplementary material
Source: PubMed Central journal article supplement (PMC4000088)
Supplement: embj0033-0702-sd9.pdf [file embj0033-0702-sd9.pdf]

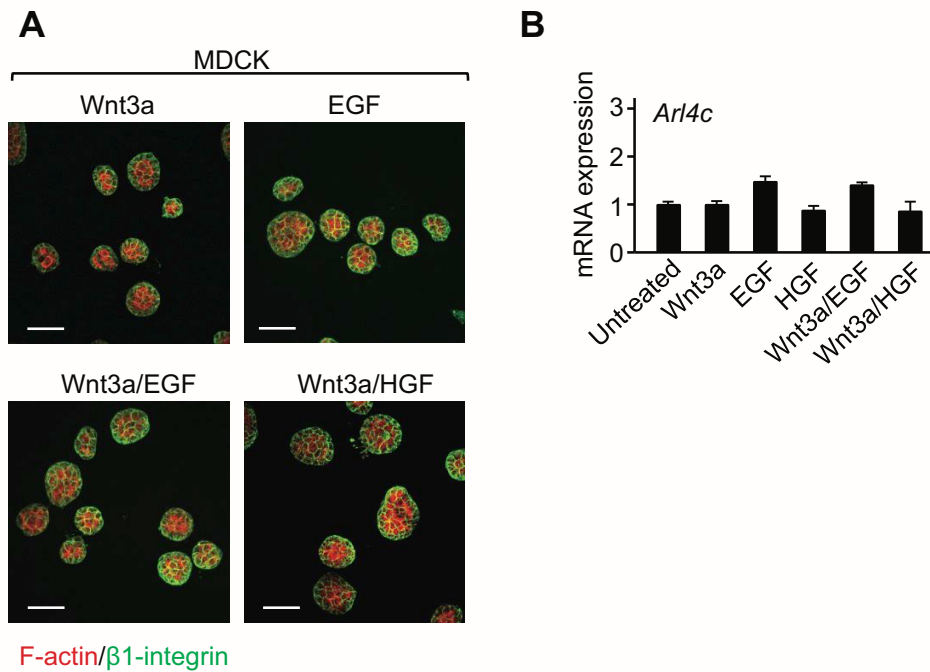

**Supplementary Figure S9** Wnt3a, EGF, HGF, or their combinations do not express *Arl4c* in MDCK II cells. **(A)** MDCK II cells were cultured with Wnt3a, EGF, Wnt3a/EGF, or Wnt3a/HGF for 60 h in 3D Matrigel and stained with anti- $\beta$ 1-integrin antibody and phalloidin. Stacking images were shown. **(B)** MDCK II cells were treated with Wnt3a, EGF, HGF, Wnt3a/EGF, or Wnt3a/HGF for 8 h and real-time PCR analyses for *Arl4c* mRNA were performed. Scale bars in **(A)**, 50  $\mu$ m.
