# Supplementary material
Source: PubMed Central journal article supplement (PMC4000088)
Supplement: embj0033-0702-sd10.pdf [file embj0033-0702-sd10.pdf]

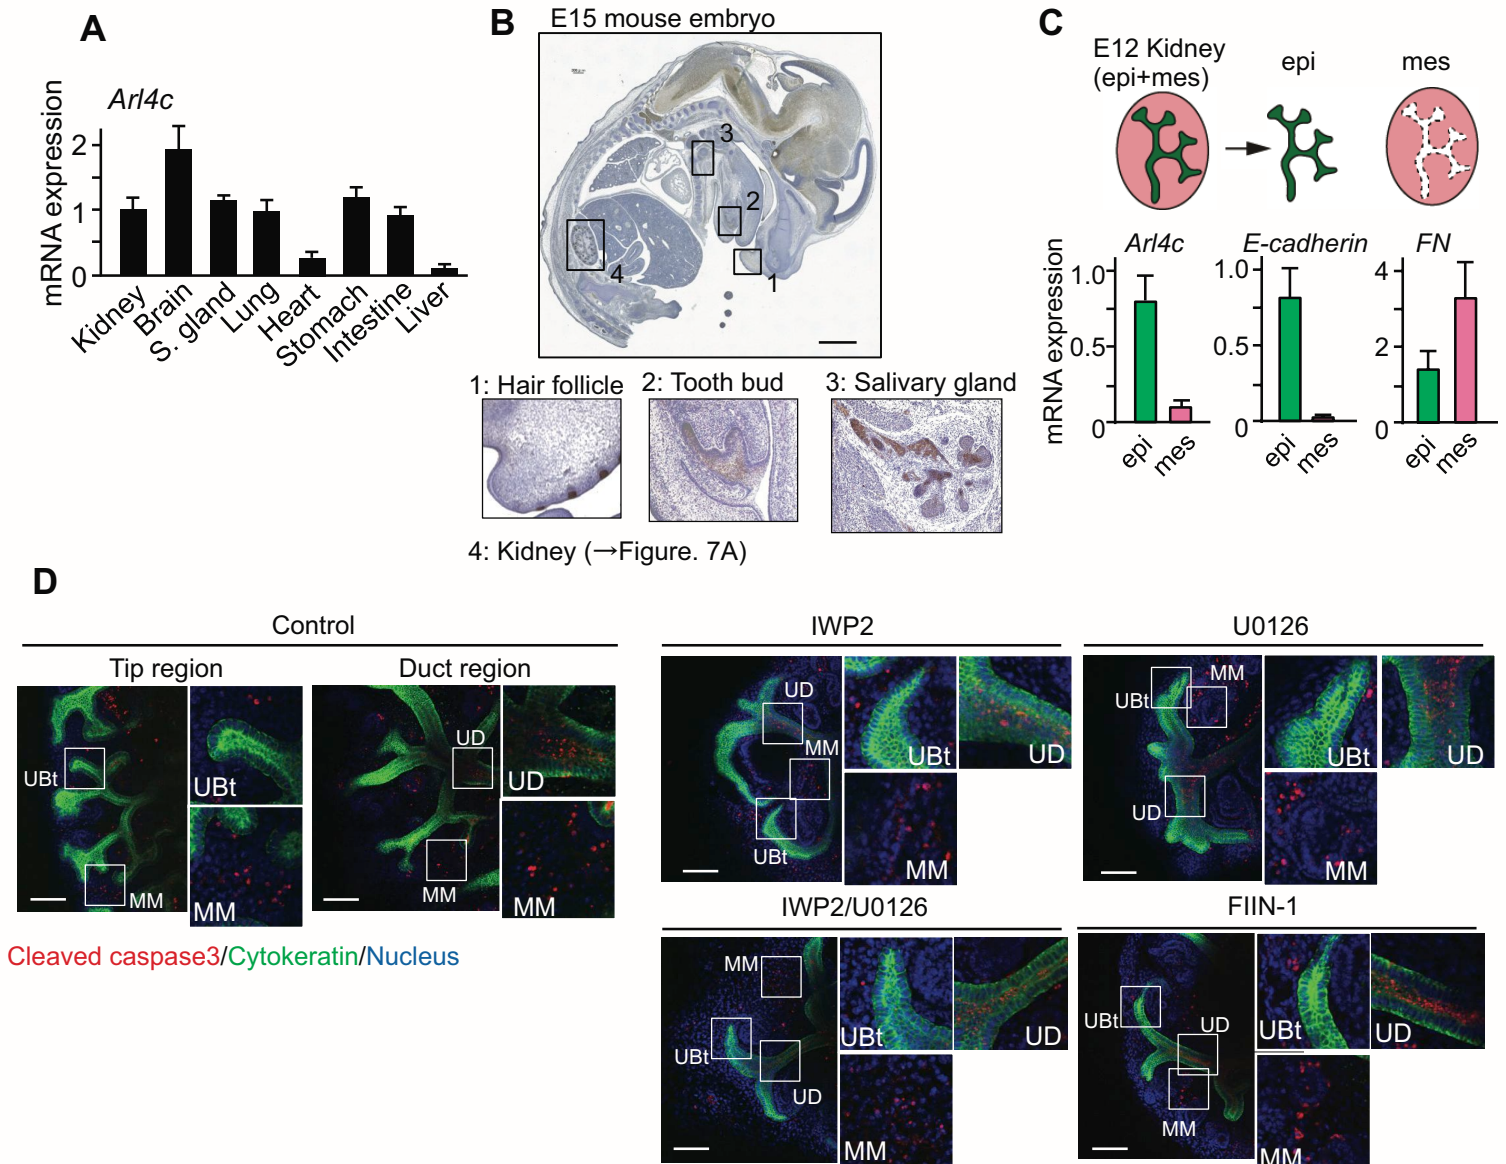

**Supplementary Figure S10** *Arl4c* is expressed in embryonic kidneys. (A) Total mRNA was prepared from various tissues of mouse embryos (E13) and real-time PCR analyses for *Arl4c* mRNA expression were performed. Results are expressed as relative *Arl4c* mRNA levels in tissues compared with the kidneys. S. gland, salivary gland. (B) Tissue section of mouse whole embryo at embryonic day 15 (E15) were stained with anti-*Arl4c* antibody and hematoxylin. Black boxes show enlarged images. (C) Kidney rudiments at E12 were enzymatically digested and mechanically separated into epithelial (epi) and mesenchymal (mes) compartments. Total mRNA was prepared from epi and mes compartments and *Arl4c*, *E-cadherin*, and *fibronectin* (*FN*) mRNA levels were quantified. (D) Kidney rudiments at E12 were cultured on transwell filters with or without IWP2, U0126, IWP2 and U0126, or FIIN-1 for 48 h and stained with anti-active caspase-3 and anti-pan-cytokeratin antibodies and DRAQ5. White boxes show enlarged images. UBt, ureteric bud tip; UD, ureteric duct; MM, metanephric mesenchyme. Scale bars in (B), 1mm; in (D), 100  $\mu$ m.
