# Supplementary material
Source: PubMed Central journal article supplement (PMC4000088)
Supplement: embj0033-0702-sd11.pdf [file embj0033-0702-sd11.pdf]

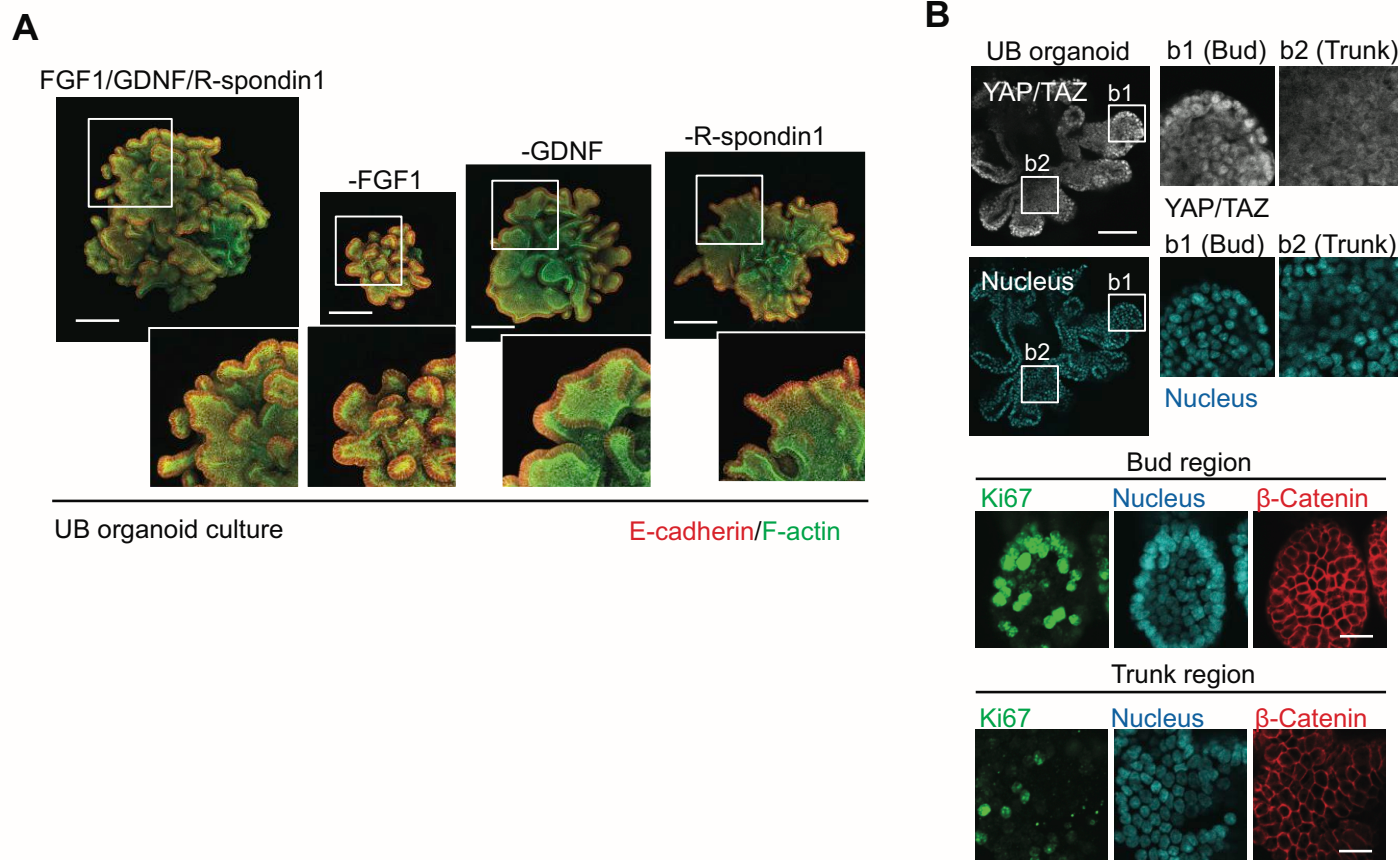

**Supplementary Figure S11** Embryonic kidney epithelium forms branched tubular structures in organoid culture. **(A)** Ureteric buds isolated from E12 mouse kidneys were cultured with FGF1/GDNF/R-spondin1, GDNF/R-spondin1 (-FGF), FGF1/ R-spondin1 (-GDNF), or FGF1/GDNF (-R-spondin1) for 7 days in 3D Matrigel. Ureteric buds were stained with anti-E-cadherin antibody and phalloidin (stacking image). White boxes show enlarged images. **(B)** Ureteric buds isolated from E12 mouse kidneys were cultured in 3D Matrigel for 5 days. Ureteric buds were stained with anti-YAP/TAZ, anti-Ki67, and anti- $\beta$ -catenin antibodies and DRAQ5. Scale bars in **(A)**, 200  $\mu$ m; in **(B)**, 100  $\mu$ m (upper panels) and 20  $\mu$ m (lower panels).
