# Supplementary material
Source: PubMed Central journal article supplement (PMC4000088)
Supplement: embj0033-0702-sd12.pdf [file embj0033-0702-sd12.pdf]

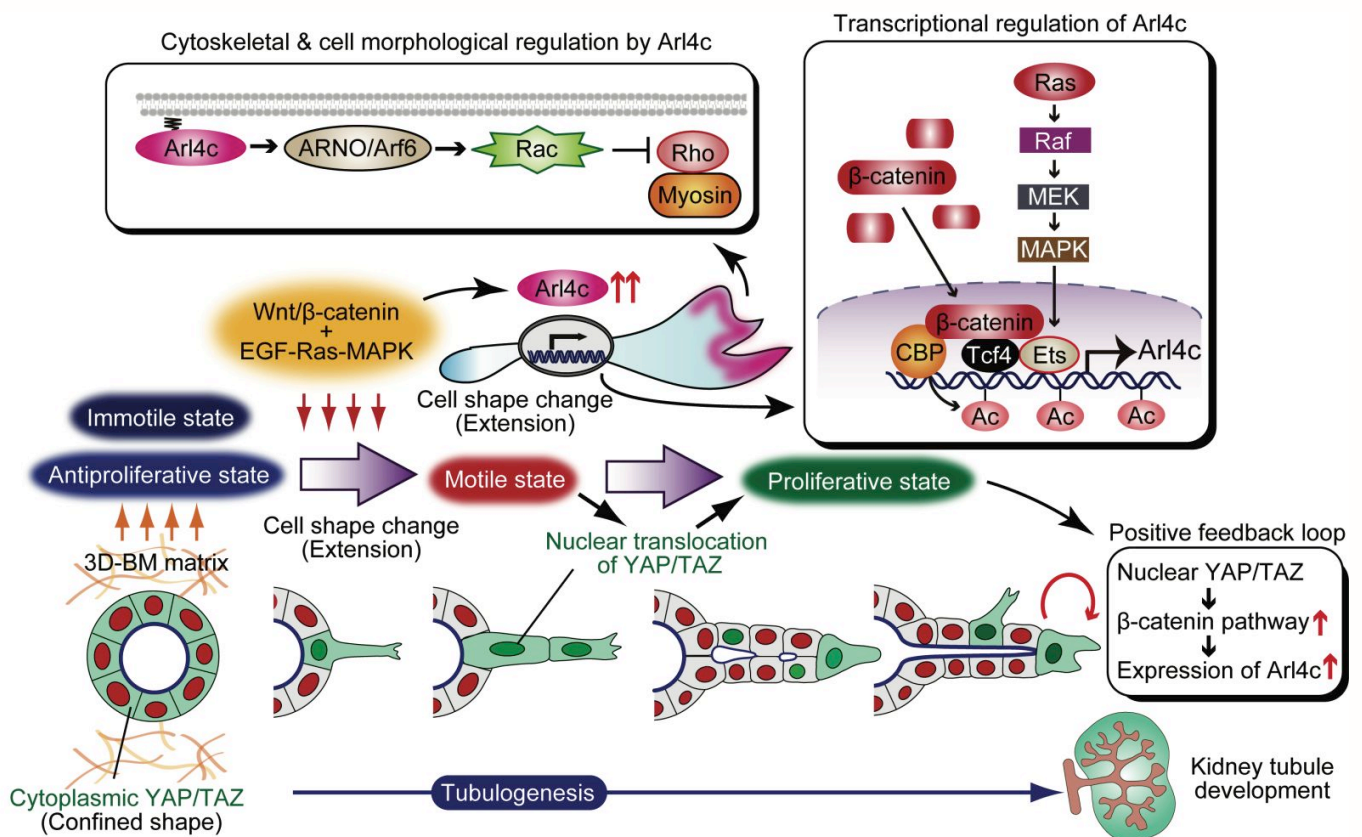

**Supplementary Figure S12** A model for Wnt and growth factor signaling-dependent epithelial tubulogenesis through Arl4c expression. The Wnt-β-catenin and EGF-MAP kinase (MAPK) pathways work in concert to induce Arl4c expression by promoting the association of β-catenin, Tcf4, Ets, and CBP, which results in changes in cell morphology through the ARNO-Arf6-Rac-Rho axis, leading to cell proliferation by YAP/TAZ to form epithelial tubular structures. Nuclear translocation of YAP/TAZ enhances Wnt3a/EGF-dependent Arl4c expression. Arl4c expression is also involved in tubulogenesis of the embryonic kidneys.
