# Supplementary material
Source: PubMed Central journal article supplement (PMC4000088)
Supplement: embj0033-0702-sd13.pdf [file embj0033-0702-sd13.pdf]

# Matsumoto et al., Table S1

| Gene name                                     | Gene symbol | Accession number | Change ratios |       |      |             |
|-----------------------------------------------|-------------|------------------|---------------|-------|------|-------------|
|                                               |             |                  | UT            | Wnt3a | EGF  | Wnt3a/EGF   |
| ADP-ribosylation factor-like 4C               | Arl4c       | XM_003754547.1   | 0             | 0.69  | 0.95 | 2.16 (4 h)  |
|                                               |             |                  | 0             | -0.85 | 0.81 | 1.83 (24 h) |
| purinergic receptor P2Y, G-protein coupled, 2 | P2ry2       | NM_017255.1      | 0             | 1.16  | 1.39 | 2.44 (4 h)  |
|                                               |             |                  | 0             | 0.68  | 0.59 | 1.86 (24 h) |

**Supplementary Table S1** Gene expression levels increased by treatment with Wnt3a/EGF. DNA microarray analyses were performed as described in the Method. Candidate genes were selected based on the criteria that the expression levels were higher in cells treated with Wnt3a/EGF than in cells treated with either Wnt3a or EGF at 4 and 24. The change ratios of each gene at 4 and 24 h after stimulation are shown. UT, Untreated.
