# Supplementary material
Source: PubMed Central journal article supplement (PMC4000088)
Supplement: embj0033-0702-sd14.pdf [file embj0033-0702-sd14.pdf]

# Matsumoto et al., Table S2

| Primary antibodies                                               | Application(s) and working dilution(s) |
|------------------------------------------------------------------|----------------------------------------|
| Anti- $\beta$ -catenin (Cell Signaling)                          | IB 1:5,000; IF 1:500                   |
| Anti-phospho-LRP6 (Ser1490) (Cell Signaling)                     | IB 1:1,000                             |
| Anti-active (cleaved) caspase-3 (Cell Signaling)                 | IF 1: 250                              |
| Anti-Axin1 (Cell signaling)                                      | IB 1:1,000                             |
| Anti-Dvl2 (Cell Signaling)                                       | IB 1:1,000                             |
| Anti-phospho-myosin light chain 2 (Thr18/Ser19) (Cell Signaling) | IF 1:200                               |
| Anti-RhoA (Cell Signaling)                                       | IB 1:1,000                             |
| Anti-Arf6 (Cell Signaling)                                       | IB 1:1,000                             |
| Anti-YAP/TAZ (Cell Signaling)                                    | IB 1:2,000; IF 1:200                   |
| Anti-phospho-Ezrin (Thr567) (Abcam)                              | IF 1:200                               |
| Anti-Ezrin (Abcam)                                               | IF 1:200                               |
| Anti-LRP6 (Abcam)                                                | IB 1:1,000                             |
| Anti-Arl4c (Abcam)                                               | IF 1:100; IHC 1:100                    |
| Anti-Cytokeratin8 (Abcam)                                        | IF 1:200                               |
| Anti- $\beta$ -tubulin (Sigma)                                   | IB 1:5,000                             |
| Anti-Cytokeratin,pan (Sigma)                                     | IF 1:100                               |
| Anti-NCAM (Sigma)                                                | IF 1:100                               |
| Anti-Rac1 (BD Biosciences)                                       | IB 1:5,000                             |
| Anti-FAK (BD Biosciences)                                        | IB 1:2,500                             |
| Anti- $\beta$ -catenin (BD Biosciences)                          | IB 1:2,500                             |
| Anti-E-cadherin (BD Biosciences)                                 | IF 1:250                               |
| Anti-HSP90 (BD Biosciences)                                      | IB 1:5000                              |
| Anti-Clathrin (BD Biosciences)                                   | IB 1:5000                              |
| Anti-phospho-FAK (Tyr397) (Invitrogen)                           | IB 1:1,000                             |
| Anti-Dvl3 (Santa Cruz)                                           | IB 1:1,000                             |
| Anti-PKC $\zeta$ (Santa Cruz)                                    | IF 1:200                               |
| Anti-Ets1 (C-20) (Santa Cruz)                                    | IB 1:1,000                             |
| Anti-Ets1 (C-4) (Santa Cruz)                                     | IB 1:1,000                             |
| Anti-mAG1 (MBL)                                                  | IF 1:500                               |
| Anti-mKO2 (MBL)                                                  | IF 1:500                               |
| Anti-Arl4c (Proteintech)                                         | IB 1:100                               |
| Anti-Tcf3/4 (Millipore)                                          | IB 1:1,000                             |
| Anti-Dvl1 (DIX) (generated in rabbits by immunization)           | IB 1:5,000                             |

**Supplementary Table S2** Primary antibodies used in this study. IB, immunoblotting; IF, immunofluorescence; IHC, immunohistochemistry.
