# Supplementary material
Source: PubMed Central journal article supplement (PMC4000088)

# Figure 1

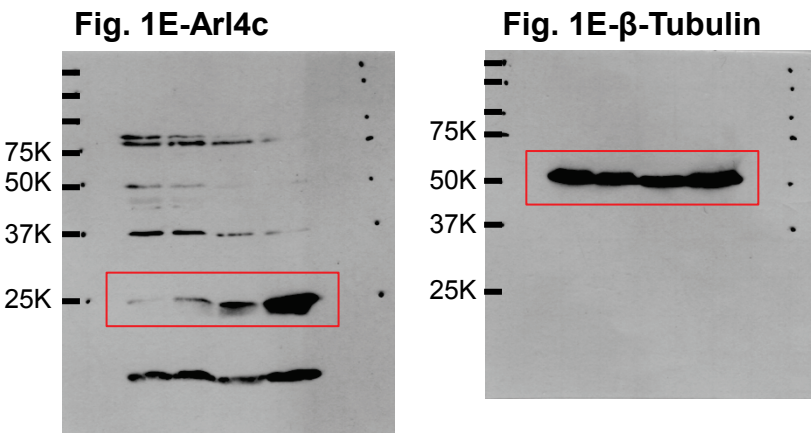

Supplement: embj0033-0702-sd17.pdf [file embj0033-0702-sd17.pdf]

# Figure 2

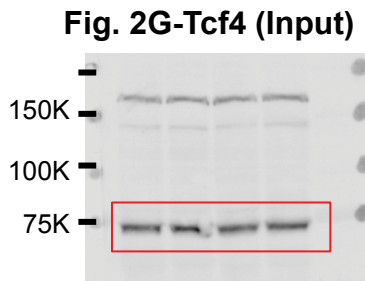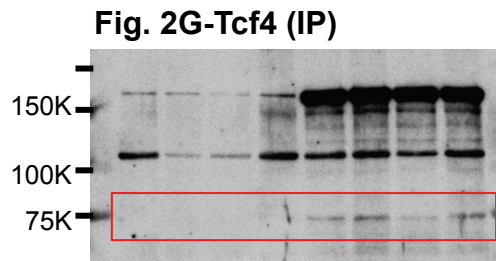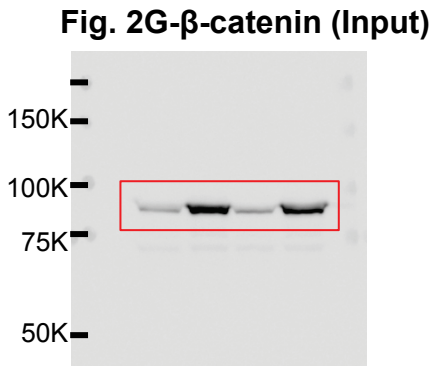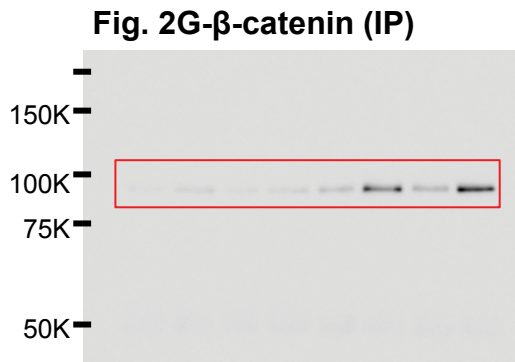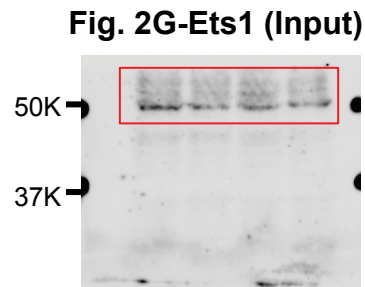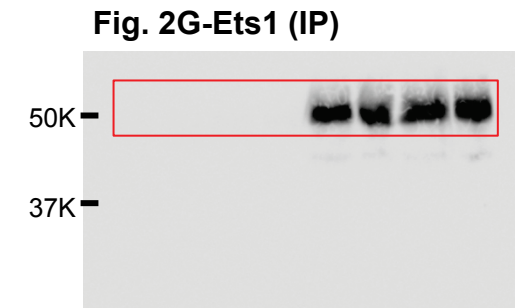

Supplement: embj0033-0702-sd18.pdf [file embj0033-0702-sd18.pdf]

# Figure 4

**Fig. 4D-pYAP (S127)**

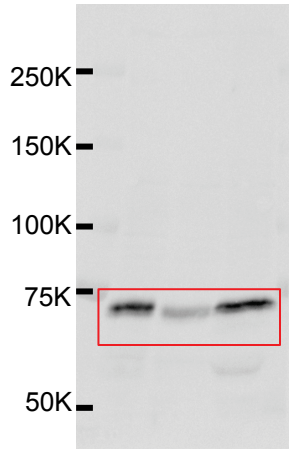

**Fig. 4D-YAP**

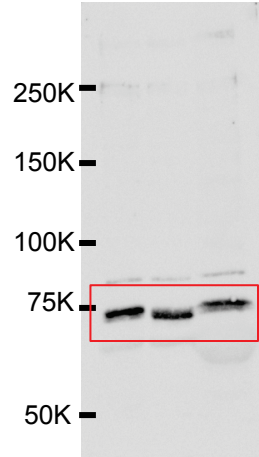

**Fig. 4D-pFAK (T397)**

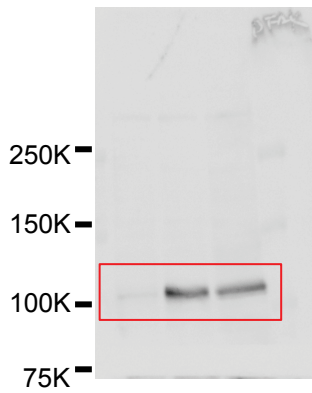

**Fig. 4D-FAK**

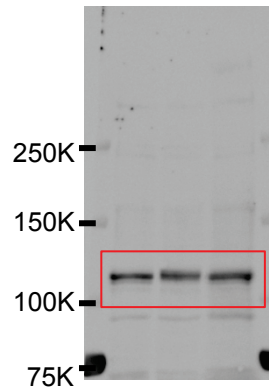

Supplement: embj0033-0702-sd20.pdf [file embj0033-0702-sd20.pdf]

# Figure 6

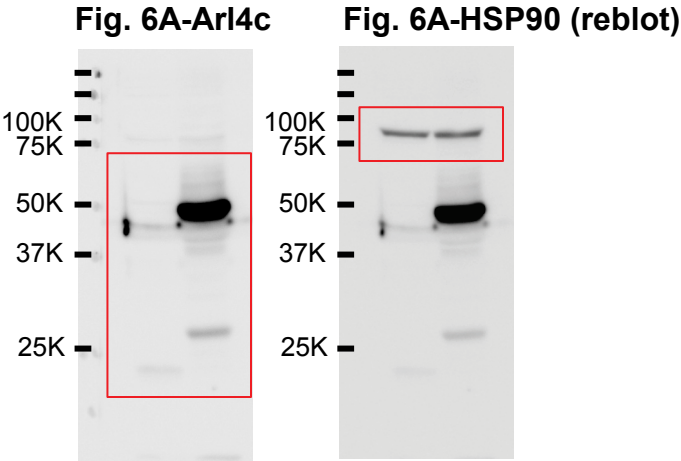

Supplement: embj0033-0702-sd21.pdf [file embj0033-0702-sd21.pdf]
